1 Alpha synuclein aggresomes inhibit ciliogenesis and multiple functions of the centrosome

2

3 Anila Iqbal<sup>†</sup>, Marta Baldrighi<sup>†#</sup>, Jennifer N. Murdoch<sup>†</sup>, Angeleen Fleming<sup>‡</sup> and Christopher J.

4 Wilkinson<sup>†</sup>.

5

6 <sup>†</sup>Centre for Biomedical Sciences,

7 Department of Biological Sciences,

8 Royal Holloway University of London,

9 Egham,

10 Surrey,

11 TW20 0EX,

12 United Kingdom.

13

14 <sup>‡</sup>Department for Physiology, Development and Neuroscience,

15 University of Cambridge,

16 Cambridge,

17 CB2 3DY,

18 United Kingdom.

19 # Present address: Department of Medicine, University of Cambridge, Cambridge, UK.

20 Email: [christopher.wilkinson@rhul.ac.uk](mailto:christopher.wilkinson@rhul.ac.uk)

21

22 Running title: aggresomes and centrosomes/cilia

23

24 Keywords: Parkinson's disease, centrosome, aggresome, cilia, Lewy body, alpha-synuclein.

25

## 26 **Abstract**

27 Protein aggregates are the pathogenic hallmarks of many different neurodegenerative  
28 diseases and include the Lewy bodies found in Parkinson's disease. Aggresomes are closely-  
29 related cellular accumulations of misfolded proteins. They develop in a juxtannuclear position,  
30 adjacent to the centrosome, the microtubule organizing centre of the cell, and share some  
31 protein components. Despite the long-standing observation that aggresomes/Lewy bodies and  
32 the centrosome sit side-by-side in the cell, no studies have been done to see whether these  
33 protein accumulations impede the organelle function. We investigated whether the formation  
34 of aggresomes affected key centrosome functions: its ability to organize the microtubule  
35 network and to promote cilia formation. We find that when aggresomes are present, neuronal  
36 cells are unable to organise their microtubule network. New microtubules are not nucleated  
37 and extended, and the cells fail to respond to polarity cues. Since dopaminergic neurons are  
38 polarised, ensuring correct localisation of organelles and the effective intracellular transport  
39 of neurotransmitter vesicles, loss of centrosome activity could contribute to loss of  
40 dopaminergic function and neuronal cell death in Parkinson's disease. In addition, we  
41 provide evidence that many cell types, including dopaminergic neurons, cannot form cilia  
42 when aggresomes are present, which would affect their ability to receive extracellular signals.

43

## 44 **Introduction**

45

46 Parkinson's disease is a progressive neurodegenerative condition that affects 1 in 500  
47 of the population (Alves et al, 2008; Schrag et al, 2000; Van Den Eeden et al, 2003; von  
48 Campenhausen et al, 2005). Dopaminergic neurons in the substantia nigra pars compacta are  
49 first affected and the characteristic early symptom of Parkinson's disease is tremor (Alves et  
50 al, 2008). As the disease progresses, other parts of the brain and nervous system are affected,  
51 with dementia occurring in later stages. Within neurons of Parkinson's disease patients, large

52 alpha-synuclein -positive intracellular inclusions known as Lewy bodies are  
53 observed (Wakabayashi et al, 2012). Increased  $\alpha$ -synuclein ( $\alpha$ -syn) levels, which occur in  
54 rare cases with multiplication of the SNCA gene encoding it, are sufficient to cause  
55 Parkinson's disease (Ibanez et al, 2004; Singleton et al, 2003) and mutations associated with  
56 SNCA lead to an increase in aggregation propensity (Conway et al, 1998; Kruger et al, 1998;  
57 Polymeropoulos et al, 1997). These mutations cause  $\alpha$ -syn to form oligomers and fibrils then  
58 aggregates. Large aggregates of  $\alpha$ -syn constitute the Lewy bodies frequently found in the  
59 neurons of Parkinson's disease patients (Baba et al, 1998; Spillantini et al, 1997). It is unclear  
60 if these aggregates or Lewy bodies are a means to protect the cell from smaller unfolded units  
61 of  $\alpha$ -syn or if these structures cause neuronal death by obstructing the normal function of the  
62 cell.

63 Lewy bodies are observed in several diseases (Parkinson's disease, dementia with  
64 Lewy bodies, incidental Lewy Body disease (Wakabayashi et al, 2012)) but are not found in  
65 healthy cells and are related to the aggresome, a structure found in cells that are processing  
66 large amounts of waste, unfolded polypeptide (Johnston et al, 1998). The aggresome is  
67 juxtannuclear inclusion body containing heat-shock proteins and components of the ubiquitin-  
68 proteasome system (Olzmann et al, 2008). These components are also found within Lewy  
69 bodies and there are shared ultrastructural similarities. This has led to the proposal that Lewy  
70 bodies are derived from aggresomes to specifically deal with misfolded  $\alpha$ -syn (McNaught et  
71 al, 2002; Olanow et al, 2004).

72 The juxtannuclear location of the aggresome is shared by the centrosome, the  
73 microtubule organising centre of the cell. Indeed, they sit side-by side and centrosomal  
74 markers such as gamma tubulin are often used to detect the aggresome, alongside the  
75 intermediate filaments such as vimentin that cage the structure (McNaught et al, 2002). While  
76 the position of the aggresome at the centre of the microtubule network has logic in terms of

77 transporting unfolded protein to a central location to be further processed (e.g. by  
78 proteasomal degradation), it may affect the function of the centrosome, whose major role is  
79 to organise this part of the cytoskeleton. Steric hindrance on a macromolecular scale may  
80 perturb centrosome function. Furthermore, the centrosome is used to make the cilium. This  
81 hair-like structure on the surface of cells has important roles both in motility, inter-cellular  
82 communication and monitoring the external environment, with very specialised cilia housing  
83 photopigments and olfactory receptors (Ibanez-Tallon et al, 2003; Nigg & Raff, 2009). To  
84 make the cilium, the centrioles of the centrosome migrate to the cell surface, a process that  
85 could be blocked by a large aggregate of protein smothering the centrosome or sticking it to  
86 the nucleus.

87       The colocalization of the aggresome and centrosome and the sharing of protein  
88 components has been known for nearly twenty years. However, it has not yet been tested if  
89 this colocalization affects the function of the centrosome. This could have important  
90 implications for the aetiology of Parkinson's disease and other neurodegenerative diseases in  
91 which such aggregates are formed. In this study we sought to test whether multiple functions  
92 of the centrosome were impeded by the presence of aggresomes in their close vicinity using  
93 both *in vitro* and *in vivo* models. Our results suggest that inhibition of centrosome function  
94 might contribute to loss of function in neurons where there is aggregation of alpha synuclein.

95

## 96 **Results**

97

### 98 **Aggresomes localise in close proximity to the centrosome**

99 We confirmed that we could induce the formation of aggresomes in a variety of cell types  
100 using two previously published methods (Tanaka et al, 2004; Winslow et al, 2010). Cells  
101 were either treated with MG-132, a proteasome inhibitor, or transfected with expression

102 constructs encoding GFP fusions of human  $\alpha$ -syn wildtype or mutant versions, A30P and  
103 A53T, found in familial cases of Parkinson's disease (Kruger et al, 1998; Polymeropoulos et  
104 al, 1997). The presence of aggresomes was then confirmed by staining with established  
105 markers for aggresomes: anti-vimentin or anti-gamma tubulin antibodies (Johnston et al,  
106 1998; Olanow et al, 2004; Wigley et al, 1999). We tested aggresome formation in SH-SY5Y  
107 cells, a neuroblastoma line, either growing in continuous culture or after differentiation into  
108 dopaminergic neurons if treated with retinoic acid, and in rat basal ganglion neurons. Using  
109 both approaches, aggresome formation was observed, with vimentin caging the aggresomes  
110 and gamma tubulin seen as a dense area of staining next to the nucleus instead of the usual  
111 two punctae, representing the centrosome (Supplementary Fig. S1). Importantly, endogenous  
112  $\alpha$ -syn was observed in aggresomes induced by MG-132, demonstrating that both methods  
113 resulted in the accumulation of disease-associated, aggregate-prone proteins. These two  
114 methods were used in parallel in the majority of studies, however, low transfection efficiency  
115 prevented the use of the  $\alpha$ -syn overexpression constructs in differentiated SH-SY5Y cells or  
116 rat basal ganglion neurons.

117

### 118 **Aggresomes suppress microtubule nucleation**

119 The major function of the centrosome in interphase cells is the nucleation and  
120 organisation of the microtubule network (Bornens, 2002). The ability of the centrosome to  
121 nucleate microtubules can be assayed by the microtubule regrowth assay, in which the  
122 microtubules are first depolymerised by cold treatment for 30 min (Fig 1, 37°C, t-30 column  
123 vs 4°C, t = 0 column) followed by warming of the cells so that the centrosome can nucleate a  
124 new network (Fig 1, columns 37°C, t+0.5' to 37°C, t+10') (De Brabander et al, 1986; Fry et  
125 al, 1998). In control, untreated SH-SY5Y cells, the microtubules were nucleated after 30 s of  
126 warming following depolymerisation, with a clear aster of alpha tubulin staining and an

127 extensive network after 10 min, as visualised by alpha tubulin staining (Fig. 1A, top row). In  
128 contrast, cells treated with 1 $\mu$ M MG-132 for 24 h prior to the assay did not nucleate any  
129 microtubules after 10 min warming (Fig 1A, second row), with only  $5.3 \pm 0.58\%$  of treated  
130 cells starting nucleation but  $84 \pm 5.0\%$  of untreated cells making an aster (Fig. 1B 100 cells,  
131 triplicate experiment). For SH-SY5Y cells transfected with expression constructs for GFP-  
132 tagged  $\alpha$ -syn, only  $23 \pm 3.5\%$  of the cells initiated microtubule nucleation by 10 min whereas  
133  $72 \pm 3.8\%$  of cells transfected with a control GFP expression plasmid re-established their  
134 network within the same time (Fig. 1A third row, transfected cells delineated with dashed  
135 line, identified by GFP expression (not shown); (GFP-transfected, familial mutant GFP  
136 fusions and same data with GFP signal from transfected cells all shown in Supplementary  
137 Fig. S2; 100 cells, triplicate experiment).

138         Due to the morphology of the cell and the number of stabilized microtubules, the  
139 network and reforming aster is more difficult to observe in differentiated SH-SY5Y cells than  
140 in continuously growing cell lines. Nevertheless, whereas untreated cells were able to reform  
141 their labile microtubule network, differentiated SH-SY5Y cells were not, when aggresome  
142 formation was induced by MG-132 treatment (Fig. 1 bottom two rows).  $21 \pm 6.7\%$  of treated  
143 cells were able to make an aster whereas  $78 \pm 4.2\%$  of untreated cells re-establish their labile  
144 microtubule network. Quantification is show in Fig. 1B & C.

145

### 146 **Aggresomes prevent cell migration**

147 The microtubule network is remodeled in response to polarity cues. This is exemplified by  
148 cell migration, during which the Golgi and centrosome are re-orientated to face the direction  
149 of cell locomotion. This function of the centrosome can be tested by the wound assay  
150 developed by Hall (Nobes & Hall, 1999). A strip of cells is removed from a confluent culture  
151 of an amenable cell line and those at the border of this wound will migrate to close the gap.

152 We tested the ability of cells to migrate in the presence of aggresomes induced by MG-132.  
153 RPE1-hTERT cells generate aggresomes in the presence of 1  $\mu$ M MG-132 as assayed by  
154 changes in gamma tubulin staining, from two punctae to a large area of signal close to the  
155 nucleus (Fig. 2: A, untreated; B, treated). RPE1-hTERT cells can migrate and close a  
156 'wound' in 12 h (Fig. 2D-G). In the presence of aggresomes generated by MG-132 treatment,  
157 migration was halted with no cell movement to close the gap (Fig. 2H-K). Time-lapse  
158 observations of treated and untreated cells (Supplementary Videos 1 and 2) clearly  
159 demonstrate this lack of migration, quantified in Fig. 2C. The Golgi also did not re-orientate  
160 as in control cells, with control cells' Golgi moving to face the wound (Fig. 2L vs M)  
161 whereas in treated cells the Golgi remained randomly orientated (Fig. 2N vs O). 25% of the  
162 wound was closed in treated cells versus near-complete wound closure for untreated cells. If  
163 we measure the angle of the Golgi relative to a line perpendicular the wound, then treated  
164 cells have a random orientation of the Golgi (average of 66.7° displacement from  
165 perpendicular) whereas control cells are facing the wound (average of 44.2° displacement  
166 from perpendicular) (Fig. 2P,Q).

167

### 168 **Aggresome formation inhibits ciliogenesis**

169 We next tested if the presence of aggresomes prevents cells from making cilia as  
170 ciliogenesis requires the centrioles of the centrosome to move to the cell surface where one  
171 centriole templates the axoneme that forms the internal structure of the cilium. Many cell  
172 types ciliate, but not all. To test whether aggresome inhibition of ciliogenesis might be  
173 relevant to the dopaminergic neurons affected early in Parkinson's disease, we tested several  
174 cell types for the presence of cilia by staining for acetylated tubulin together with gamma  
175 tubulin to mark the basal bodies. Undifferentiated SH-SY5Y cells generated cilia when serum  
176 starved and GFP expression did not affect ciliogenesis (Fig. 3A,B). Undifferentiated SH-

177 SY5Y cells failed to ciliate when treated with MG-132 (Fig. 3C) or when GFP- $\alpha$ -syn (any  
178 variant, only wild-type  $\alpha$ -syn shown) was overexpressed (Fig. 3D). Quantification is shown  
179 in Fig 3I.

180 Differentiated SH-SY5Y cells formed cilia as part of their differentiation programme  
181 (Fig. 3E) but did not do so when treated with MG-132 (Fig. 3F). Rat basal ganglion cells are  
182 ciliated under their normal culture conditions (Fig. 3G) but their ciliogenesis was much  
183 reduced when treated with MG-132 (Fig. 3H). Quantification is shown in Fig. 3J,K.

184 To test whether aggresome formation affected ciliogenesis in an *in vivo* system, we  
185 performed  $\alpha$ -syn over-expression experiments in zebrafish embryos. Cilia are abundant in  
186 zebrafish embryos and larvae and the olfactory pit in embryonic / larval zebrafish is highly  
187 ciliated and accessible to observation. The ciliated cells of the olfactory pit are dopaminergic  
188 neurons, as indicated by tyrosine hydroxylase (TH)-positive staining (Fig. 4 A). Treatment of  
189 embryos with MG-132 caused loss of cilia at 3 dpf (Fig. 4: B, untreated; C, treated) with cilia  
190 number being reduced from  $65 \pm 11$  per pit to  $15 \pm 6$  (Fig. 4I). We injected 1-cell embryos  
191 with *in vitro* transcribed mRNA encoding human  $\alpha$ -syn, (WT and familial mutants) and GFP  
192 as a control (Fig. 4 D, E). Larvae were fixed at 2 dpf and assayed for olfactory cilia by  
193 wholemount acetylated tubulin staining (Fig. 4 F, G; again familial mutants show same result  
194 as WT  $\alpha$ -syn). Cilia numbers were much reduced ( $11 \pm 3.6$  vs  $41 \pm 5.3$  per pit) in the  
195 olfactory zone when the embryos overexpressed  $\alpha$ -syn, any variant (Fig. 4H). The remaining  
196 cilia were reduced in length, by approximately 50% from  $8.4 \pm 0.49 \mu\text{m}$  to  $4.7 \pm 0.71 \mu\text{m}$   
197 (Fig. 4J). The gross anatomy of these embryos was otherwise normal (Fig 4D, E; data not  
198 shown). Absence of cilia may be expected to cause other defects during embryogenesis, for  
199 example hydrocephaly, left-right asymmetry defects and pronephric cysts. We did not  
200 observe these defects. However, the effect on ciliogenesis at the olfactory pits was mild at 24



201 hpf. We therefore suspect that accumulation of  $\alpha$ -syn is required over several days to inhibit  
202 ciliogenesis and so earlier stages escape the effects of aggresome-induced cilium loss.

203

## 204 **Discussion**

205 Aggresomes occupy a central position in the cell, at the hub of the microtubule  
206 network and that places them in the vicinity of the centrosome, the major microtubule  
207 organising centre of the cell. Furthermore, the aggresome acquires an important centrosomal  
208 component, gamma tubulin. We show here that aggresomes severely compromise centrosome  
209 function. Microtubule nucleation is severely reduced and the centrosome is unable to be  
210 repositioned during cell migration. These affects are observed whether the aggresomes are  
211 generated by proteasome inhibition or alpha synuclein overexpression. Indeed MG-132  
212 treatment generates aggresomes in which endogenous alpha synuclein accumulates. These  
213 results and are consistent with and extend previous observations of the effect of MG-132 on  
214 microtubule nucleation (Didier et al, 2008). A simple, steric hindrance of the centrosome is  
215 the simplest and most likely explanation for this effect.

216 The centrosome is the main microtubule organising centre in the cell, nucleating  
217 microtubules and anchoring a portion near to the nucleus. Its role as a major component of  
218 the spindle poles is not important in mature neurons which do not divide. However, a  
219 functioning, polarised microtubule network is still required for intracellular trafficking in a  
220 terminally differentiated cell such as neurons and the centrosome is essential for maintaining  
221 this. Much research on Parkinson's disease currently focusses on the mitochondrion (Exner et  
222 al, 2012). Without a functioning centrosome and therefore a properly organised microtubule  
223 network, it is likely that the mitochondria will themselves not be trafficked correctly in the  
224 cell, with a particular impact on cells with a high energy demand, like neurons.

225           Most neurons do not migrate so the effect of aggresomes on cell migration is probably  
226 not relevant to the development of Parkinson's disease. However, the inability of cells to  
227 migrate and the Golgi to re-orientate in this situation provides a useful surrogate read-out for  
228 the inability to repolarise the microtubule network in a desired direction. In mature neurons,  
229 compromised cell polarity could have severe long-term effects on neuronal function and  
230 survival. A polarised microtubule network is essential for the rapid trafficking of organelles  
231 and vesicles, especially those containing neurotransmitters that need to be transported to  
232 synapses, and the recycling of materials involved in neurotransmission.

233           Nearly all cell types make a cilium but neurons are one group of cells that contain  
234 both unciliated (and centrosome possessing) sub-types and ciliated (acentrosomal) subtypes.  
235 Our results show that aggresomes can prevent a cell from turning its centrosome into a  
236 cilium. In Parkinson's disease, this may be relevant to those cells that undergo ciliogenesis.  
237 An early symptom of Parkinson's disease is loss of smell and anosmia may precede other  
238 symptoms (Doty et al, 1988; Haehner et al, 2007). It is not clear what the cause of anosmia  
239 is, the assumption being that loss or impairment of neurons processing olfactory information  
240 is the cause. An alternative explanation is that the olfactory neurons themselves are affected  
241 during Parkinson's disease progression. Olfactory neurons are part of the dopaminergic  
242 system (Pignatelli & Belluzzi, 2017) and the olfactory receptors are housed in cilia on these  
243 cells. If early in the development of Parkinson's disease the ability of olfactory neurons to  
244 renew cilia was compromised then so would the sense of smell. It may be possible, then, that  
245 this early symptom is a result of gradual loss of cilia from olfactory neurons. If this is the  
246 case, then cilia density in the olfactory epithelium of Parkinson's patients should be reduced  
247 in age-matched controls. This hypothesis certainly warrants further investigation as it may  
248 reveal that the olfactory cells are the sentinels of the dopaminergic system and anosmia  
249 represents a first indicator of dopaminergic cell dysfunction. Should olfactory cilia be

250 accessible to routine screening, their number may be an early diagnostic tool for Parkinson's  
251 disease.

252 While we have provided clear evidence that aggresome formation affects centrosome  
253 function in cell and *in vivo* models, proving that Lewy bodies affect microtubule nucleation  
254 and cellular polarity in neurons of Parkinson's patients is likely to prove difficult. However,  
255 it may be feasible to assay some of these effects in patient fibroblasts, which are more readily  
256 accessible. Furthermore, since microtubule regrowth is a biochemical phenomenon whose  
257 components may be capable of withstanding freezing it may be technically possible to  
258 observe this in clinical samples obtained from brain bank tissue.

259

260

## Materials and Methods

### 261 Cell Culture

262

263 Cell lines used include: HeLa, provided by Prof George Dickson at Royal Holloway;  
264 neuroblastoma cell line SH-SY5Y, provided by Prof Robin William at Royal Holloway;  
265 immortalised human retinal pigment epithelial cells (RPE1-hTERT), kindly provided by Prof.  
266 Erich Nigg, Basel, Switzerland; mouse embryonic fibroblast cells (MEFs), provided by Dr  
267 Jenny Murdoch at Royal Holloway. Primary rat basal ganglion neurons were prepared by Dr  
268 Simona Ursu at Royal Holloway.

269

270 HeLa and SH-SY5Y cells were maintained in Dulbecco's Modified Eagle's Medium  
271 (DMEM) supplemented with 10% Foetal Bovine Serum (FBS), 1x Antibiotic-Antimycotic  
272 mix (Gibco; 5000 units of penicillin, 5000µg streptomycin and 15µg Amphotericin B) and  
273 2mM L-glutamine. RPE1-hTERT were grown in Dulbecco's Modified Eagle's Medium with  
274 nutrient mixture F-12 Ham (DMEMF-12) supplemented with 10% FBS, 1x Antibiotic-  
275 Antimycotic (5000 units of penicillin, 5000µg streptomycin and 15µg Gibco Amphotericin

276 B), 2mM L- glutamine and 0.38% Sodium bicarbonate. MEFs were grown in DMEM  
277 supplemented with 10% FBS, 1x Antibiotic-antimycotic, 2mM L- glutamine and 1x non-  
278 essential amino acids. All cell lines were cultured at 37°C in a humidified atmosphere with  
279 5% CO<sub>2</sub>. The same media mix was used for future experimental assays unless otherwise  
280 stated.

281

## 282 **Primary Basal Ganglion neurons**

283

284 Primary cultures of basal ganglion neurons were prepared from E18 Sprague Dawley rat  
285 embryos as previously described (Marsh et al, 2017). Briefly, cells were plated at a density  
286 of either 75,000 or 500,000 cells on poly-D-lysine-coated (Sigma, 0.1 mg/ml in borate buffer  
287 pH 8.5) 22mm<sup>2</sup> glass cover slips. The plating medium was DMEM supplemented with 5%  
288 FBS, penicillin/streptomycin and 0.5 mM L-glutamine (all from Invitrogen). On the next day  
289 the medium was changed to full Neurobasal medium (Neurobasal medium supplemented  
290 with B27, 0.5 mM L-glutamine, all from Invitrogen). Cultures were incubated at 37 °C and  
291 5% CO<sub>2</sub>, and were used at 18 days *in vitro*.

292

## 293 **SH-SY5Y Differentiation**

294

295 Cells were plated on collagen-coated coverslips in 12-well plates. Optimised seeding density  
296 was calculated to be 6 X 10<sup>4</sup> cells in 12-well culture plates. Cells were seeded out in DMEM  
297 serum supplemented media, The media was replaced the following day with DMEM-F12  
298 supplemented with 1% FBS, 2mM L-Glutamine, 1x Antibiotic- Antimitotic mix (5000 units  
299 of penicillin, 5000µg streptomycin and 15µg Gibco Amphotericin B), 1 X non-essential

300 amino acids and 10  $\mu$ M all trans-retinoic acid (RA). Every two days the media was  
301 replenished and after 7 days differentiation was observed.

302

### 303 **Aggresome formation**

304

305 Aggresomes were induced by either treating cells with the proteasome inhibitor MG-132  
306 (Sigma Aldrich) or by overexpressing GFP-tagged human  $\alpha$ -syn. The optimal MG-132  
307 concentration was determined for each cell line ranging from 1 $\mu$ M to 10 $\mu$ M (HeLa, 10  $\mu$ M;  
308 SH-SY5Y, 1  $\mu$ M; differentiated SH-SY5Y, 1 $\mu$ M; MEFs, 5  $\mu$ M and rat neurons, 3  $\mu$ M). MG-  
309 132 was added to media for 18 hours at 37°C in a humidified atmosphere with 5% CO<sub>2</sub>.

310

311 Constructs including peGFP-C2, peGFP- $\alpha$ SYN, peGFP- $\alpha$ SYNA30P and peGFP- $\alpha$ SYNA53T  
312 were transiently transfected into cells. Lipofectamine 2000 (ThermoFisher) was used as the  
313 transfection reagent following manufacturer's instruction. In brief, cells were plated onto  
314 glass coverslips in serum-supplemented media without antibiotic-antimycotic mix. At 70%  
315 confluency cells were transfected with DNA-lipid complexes (2.5  $\mu$ g of plasmid DNA was  
316 diluted in 250  $\mu$ L Opti-MEM + 10  $\mu$ L of Lipofectamine 2000 reagent in 240  $\mu$ L of Opti-  
317 MEM). Complexes were added to each well for 5 hours at 37°C after which the media was  
318 replaced by low serum-supplemented media (DMEM, 1 % FBS, 2mM L-glutamine and 1%  
319 antibiotic-antimitotic mix for HeLa and SH-SY5Y; DMEM-F12, 1 % FBS, 1% antibiotic-  
320 antimitotic mix for RPE1-hTERT). Overexpression was achieved at 72 hours from the time  
321 of transfection.

322

### 323 **Microtubule re-growth assay**

324

325 Cells were plated onto ethanol-washed glass coverslips in serum-supplemented media. At  
326 70% confluency the samples were processed for the respective condition (MG-132 treatment  
327 or overexpression of  $\alpha$ -syn). The plate was incubated on ice for 30 min then pre-warmed  
328 media (37°C) was added. Samples were fixed at different time points ranging from 0.5  
329 minutes to 25 minutes, depending on the cell line, including immediately after 30 min on ice.  
330 Cells were fixed for 10 min with methanol (-20°C), washed with PBS and stored in PBS.

331

### 332 **Ciliogenesis assay**

333

334 Cells were plated on glass coverslips in 6- or 12-well culture plates in serum-supplemented  
335 media. Cells were treated with MG-132 or transfected with  $\alpha$ -syn overexpression constructs  
336 to form aggresomes. The media was replaced the following day with serum free media;  
337 samples were incubated for 24 hours to induce cilia formation. Cells were fixed using 4%  
338 (v/v) formaldehyde (FA) for 10 min. FA was aspirated and cells were washed with PBS.  
339 Samples were stored in 0.2 % Triton in PBS until they were processed for  
340 immunocytochemistry.

341

### 342 **Cells migration assay (Scratch-Wound Assay)**

343

344 MEFs and RPE1-hTERT were used in the wound assay. MEFs were plated onto collagen-  
345 coated 35mm plastic Petri dishes. At 100 % confluency (with or without aggresome  
346 formation using MG-132) a P200 pipetman tip was used to make wound. The media was  
347 aspirated and washed twice with 1x PBS to remove detached cells. CO<sub>2</sub> independent media  
348 supplemented with 10% FBS, 2mM L-glutamine, 1 x antibiotic-antimycotic mix was added  
349 for time-lapse experiments. Images were taken using a Nikon TE300 microscope with a 37°C

350 chamber, over a 24 hour period with images taken every 2 min. Similarly RPE1-hTERT cells  
351 were plated onto ethanol-washed glass coverslips and treated with MG-132. Cell migration  
352 was assessed by fixing cells at set time points with ice-cold methanol.

353

#### 354 **Golgi orientation**

355 A Golgi positioned within  $-45^\circ$  and  $+45^\circ$  of the wound was considered to be orientated  
356 towards the wound. The average angle of orientation was calculated using the formula  
357  $(\sum \alpha^2)/n$  where  $\alpha$  is the angle between the Golgi and a line perpendicular to the wound edge.

358

#### 359 **Immunocytochemistry:**

360

361 Cells were fixed with either methanol ( $-20^\circ\text{C}$ ) or 4% (v/v) FA for 10 min. The fixative was  
362 removed and washed with PBS (3 x 5 min). Cells were blocked in 3% BSA for 30 min at  
363 room temperature. Cells were incubated with primary antibody in 1% BSA, either for 3 hours  
364 at room temperature on a shaking platform or overnight at  $4^\circ\text{C}$  on a shaking platform. After  
365 primary antibody incubation the cells were washed with PBS (3 x 5 min) and incubated with  
366 secondary antibody for 1 hour at room temperature on a shaking platform. Cells were washed  
367 with PBS (3 x 5 min), and mounted using FluorSave (Calbiochem). Primary antibodies used  
368 were: rabbit anti-Tyrosine Hydroxylase (Merck-Millipore),  $0.1 \mu\text{g/ml}$ ; mouse anti-vimentin  
369 (Sigma),  $1 \mu\text{g/ml}$ ; mouse anti-acetylated-tubulin (Invitrogen)  $1 \mu\text{g/ml}$ ; mouse anti- $\gamma$ -tubulin  
370 (Sigma),  $1 \mu\text{g/ml}$ ; rabbit anti- $\gamma$ -tubulin (Sigma),  $1 \mu\text{g/ml}$ ; mouse anti- $\alpha$ -tubulin (Sigma),  
371  $1 \mu\text{g/ml}$ ; rabbit anti- $\alpha$ -synuclein (Cell Signalling),  $10 \mu\text{g/ml}$ ; mouse anti-Golgin 97  
372 (ThermoFisher),  $1 \mu\text{g/ml}$ . Secondary antibodies used were: goat anti-mouse IgG, Alexa Fluor  
373 594-conjugated (Invitrogen)  $1 \mu\text{g/ml}$ ; goat anti-mouse IgG, Alexa Fluor 488-conjugated

374 (Invitrogen) 1µg/ml; and goat anti-rabbit IgG Alexa Fluor 488-conjugated (Invitrogen)  
375 1µg/ml. Images were taken using a Nikon Ni-E fluorescence microscope.

376

### 377 **Whole mount immunostaining**

378

379 Embryos were fixed with Dent's fixative (80:20, Methanol: DMSO) or 4% (v/v) FA  
380 overnight at 4 °C. Fixative was removed the following day; embryos fixed with Dent's  
381 fixative were stored in methanol at -20°C; FA fixed embryos were stored in PBS +0.2%  
382 Triton. Embryos fixed with Dent's fixative were permeabilised by incubation in 100%  
383 methanol for 30 mins at -20°C. Embryos were rehydrated by washing in serial dilution of  
384 methanol in PBS including: MeOH:PBS at 70:30, 50:50 and 30:70 and final wash with PBS .  
385 FA fixed embryos were permeabilised by incubation in 0.25% trypsin-EDTA in PBS for 10  
386 min on ice and then washed three times for 30 min in PBS +0.02% Triton. Embryos were  
387 blocked for 4 h in 10 % heat-inactivated goat serum, 1% bovine serum albumin and 0.2%  
388 Triton in PBS. Embryos were incubated with primary and secondary antibodies for 36 h in  
389 blocking solution. Primary antibodies used: rabbit anti-Tyrosine Hydroxylase (MERK  
390 Millipore), 0.1 µg/ml; and mouse anti-acetylated-tubulin (Invitrogen) 1µg/ml. Secondary  
391 antibodies used were goat anti-mouse IgG, Alexa Fluor 594-conjugated (Invitrogen) 1µg/ml;  
392 and goat anti-rabbit IgG Alexa Fluor 488-conjugated (Invitrogen) 1µg/ml. Confocal stacks  
393 were imaged with an Olympus FX81/FV1000 laser confocal system using Ar gas laser and  
394 He-Ne diode laser. Stacks were taken in 1µm thickness and are represented as maximum-  
395 intensity projections. Stacks were analysed using ImageJ.

396

### 397 **mRNA synthesis**

398



399 mRNAs were transcribed from the Sp6 promoter of the pCS2+-based plasmids encoding  $\alpha$ -  
400 syn and mutant forms, using the mMessage mMachine in vitro transcription kit (Ambion,  
401 TX, USA). RNA was purified using the Qiagen RNeasy kit (Qiagen).

402

### 403 **Zebrafish**

404

405 Zebrafish were maintained and bred at 26.5°C; embryos were raised at 28.5°C. Both AB and  
406 TL wild-type strains were used for these studies. Embryos were processed by 3.d.p.f.. No  
407 protected species, as defined by the Animals (Scientific Procedures) Act, 1986 were used for  
408 experiments in this study. Embryos were injected into the yolk with mRNA using a  
409 micromanipulator- mounted micropipette (Borosil 1.0 × 0.5 mm, Frederick Haer & Co., Inc.,  
410 USA) and a Picospritzer microinjector. Between 150- 200pg of mRNA was injected into the  
411 yolk of the embryos at 1-4 cell stage. For MG-132 treatment, embryos were treated with  
412 50 $\mu$ M for 48 hours. Embryos processed for immunostaining were grown in 0.003%  
413 phenylthiourea to inhibit melanin production. mRNA synthesis described below.

414

### 415 **Statistics**

416 Statistical tests used for each experiment are given in the figure legends. t-tests were used  
417 when comparing two treatments and ANOVA for multiple treatments. n numbers represent  
418 the experimental unit, either number of embryos or separate cell culture experiments.

419

### 420 **Animal studies**

421 No protected stages of zebrafish, as defined by the Animals (Scientific Procedures) Act,  
422 1986, were used for experiments in this study, only fry less than 5 d.p.f.. Rats were killed by

423 Schedule 1 methods, according to Home Office regulations, in compliance with the Animals  
424 (Scientific Procedures) Act, 1986.

425

426

427

### **Author contributions**

428 AI performed the experiments under the supervision of CJW and JNM. AI prepared the  
429 figures and legends. CJW wrote the main text. AF helped with study design and manuscript  
430 preparation.

431

432

### **Acknowledgements**

433 We thank Dr Simona Ursu for assistance with the primary neuronal cultures.

434

### **Funding**

435 This work was supported by Parkinson's UK Innovation Award K12/11.

436

### **Conflicts of interest**

437 We declare that we have no conflicts of interest.

438

439

### **Figure Legends**

440

441 **Figure 1. Microtubule nucleation is disrupted in the presence of aggresomes in**  
442 **undifferentiated and differentiated SH-SY5Y cells.** A, top row) SH-SY5Y cells have an  
443 extensive microtubule network. Upon cold treatment microtubules depolymerise. Upon  
444 warming, microtubules nucleate from the centrosome forming a characteristic aster, which  
445 continues to grow until the network is re-established. In SH-SY5Y cells the aster is seen  
446 within in 30 seconds and the microtubule network is re-established within 10 min. A, row 2)  
447 In the presence of aggresomes (1 $\mu$ M MG-132 for 18 hours) the centrosome is unable to  
448 nucleate microtubules to re-establish this network. A, third row) Aggresomes formed by the  
449 overexpression of  $\alpha$ -syn (GFP-fusion) had a similar affect: the centrosome is unable to re-  
450 establish the network in 10 min. A, row 4 and 5) In differentiated SH-SY5Y (tyrosine  
451 hydroxylase in green). microtubule nucleation is seen as asters form from the centrosome  
452 (arrow heads and inset). In the presence of aggresomes (1 $\mu$ M MG-132 for 18 hours) the  
453 density of the network is reduced and microtubule nucleation is severely compromised with  
454 staining of microtubules seen only in the last time point with no sign of asters forming. B)  
455 Quantification of microtubule regrowth in undifferentiated and differentiated SH-SY5Y when  
456 treated with MG-132 ( $p=0.0001$ , by Student's t-test, 100 cells,  $n=3$ ). C) Quantification of  
457 microtubule regrowth in SH-SY5Y when  $\alpha$ -synuclein is over-expressed ( $p=0.0001$ , one way-  
458 ANOVA, 100 cells,  $n=3$ ). Microtubule nucleation and re-establishment of this network was  
459 quantified by scoring cells (yes or no) whether the network was re-established in 10 mins.  
460  
461

462 **Figure 2. Aggresomes reduce rate of cell migration and inhibit polarity changes.** A-B) In  
463 untreated RPE1-hTERT cells,  $\gamma$ -tubulin stains the centrosome. Upon MG-132 treatment  
464 (1 $\mu$ M for 18 hours) it stains the aggresome. C) The presence of aggresomes reduces the rate  
465 of cell migration in the scratch-wound assay. D-G) RPE1 cells are able to migrate when a  
466 strip of cells is removed from a monolayer of confluent cells. Complete wound closure is  
467 observed by 8 hours. H-K) In the presence of aggresomes, minimal cell migration is detected.  
468 L, M) In control cells the Golgi orientates from a random direction to face the leading edge of  
469 the wound (Golgin-97, red). N, O) In the presence of aggresomes, this change in orientation  
470 was not seen. P, Q) Quantification of change in angle of orientation during cell migration  
471 with a schematic diagram showing how the Golgi orientation was measured. ( $p=0.0011$ , by  
472 Student's t-test, 100 cells,  $n=3$ ). Scale bars 10 $\mu$ m. Nuclei stained with DAPI (blue).

473

474

475 **Figure 3. Aggresomes inhibits ciliogenesis.** A, B) Undifferentiated SH-SH5Y cells form  
476 cilia in serum free conditions or when transfected with a control GFP only expression  
477 plasmid. C, D) When treated with MG-132 (1 $\mu$ M for 18 hours) or transfected with a GFP- $\alpha$ -  
478 syn expression plasmid, cilia formation is inhibited. E) Differentiated SH-SY5Y cells form  
479 cilia in serum free conditions. F) In the presence of aggresomes (MG-132 1 $\mu$ m for 18 hours)  
480 cilia are unable to form.  $\gamma$ -tubulin stains the aggresomes. G) Cilia are also found in TH-  
481 positive basal ganglion neurons, acetylated tubulin in red, TH in green. H) When treated  
482 with MG-132 (3 $\mu$ M for 18 hours) cilia are no longer visible. I) Quantification of ciliation in  
483 undifferentiated SH-SY5Y cells under various treatments (untreated vs. MG-132, p=0.0001,  
484 by Student's t-test, 100 cell, n=3; GFP expressing vs.  $\alpha$ -syn expression, p=0.0003, by one-  
485 way ANOVA, 100 cells, n=3). J) Quantification of cilia in differentiated SH-SY5Y cells  
486 when treated with MG-132 (p=0.0001 by Student's t-test, 100 cells counted, n=3. K)  
487 Quantification of cilia for basal ganglion neurons when treated with MG-132 (p=0.0126 by  
488 Student's t-test, 100 cells counted, n=3). Scale bars 10 $\mu$ m. DNA/nuclei stained with DAPI  
489 (blue).

490

491

492 **Figure 4. Olfactory cilia in zebrafish embryos are severely reduced in the presence of**  
493 **aggresomes.** A) The neuronal dopaminergic network in 3 d.p.f. zebrafish forebrain viewed  
494 from the dorsal aspect, detected by TH- staining (green). TH staining is also seen around the  
495 olfactory pit. Acetylated tubulin (red) stains axon tracts and cilia. B) By 3 d.p.f extensive  
496 numbers of cilia are visible at the olfactory pit. C) Embryos treated with MG-132 (50 $\mu$ M for  
497 48 hours), showed an extensive reduction in number of cilia. D, E) Overexpression of control  
498 GFP or  $\alpha$ -synuclein does not cause any anatomical defects in zebrafish larvae. F) In control  
499 GFP-injected embryos, cilia are seen in the olfactory pit in large numbers. G) Overexpression

500 of any of the three forms of  $\alpha$ -syn severely reduces numbers of cilia. Cilia length is also  
501 reduced. H) Quantification of cilia numbers in zebrafish embryos when  $\alpha$ -syn is over  
502 expressed ( $p=0.001$ , by one-way ANOVA,  $n=3$ ). I) Quantification of length of cilia when  $\alpha$ -  
503 syn is overexpressed in zebrafish embryos ( $p=0.0088$ , by one-way ANOVA,  $n=3$ ). J)  
504 Quantification of cilia numbers when embryos are treated with MG-132 ( $p=0.0024$ , by  
505 Student's t-test,  $n=4$ . Scale bar  $100\mu\text{m}$ .

506

507 **Supplementary Figure S1. SH-SY5Y cells form aggresomes when treated with MG-132.**

508 Vimentin (A-A') (red) in control HeLa cells forms a fibrous network, around the nuclei  
509 (DAPI- blue). (B-B') When treated with  $10\mu\text{M}$  MG-132 for 18 hours, vimentin positive  
510 aggresomes appear in cells, juxtaposed to the nucleus. The vimentin stain changes from a  
511 filamentous stain around the nuclei to caging the aggresome. Similarly,  $\gamma$ -tubulin (red)  
512 staining in control cells (C-C') labels the centrosomes as two punctae. Following MG-132  
513 treatment,  $\gamma$ -tubulin forms a condensed structure around the aggresome (D-D'). The  
514 expression pattern of endogenous  $\alpha$ -syn was also investigated to determine whether this  
515 protein co-localises within the aggresome. (E'-E'') In control cells,  $\alpha$ -syn (green) staining  
516 was widespread and diffuse within the cytoplasm with vimentin (red) forming a filamentous  
517 network. (F'-F'') Following MG-132 treatment,  $\alpha$ -syn aggregates were observed and co-  
518 localised with vimentin staining within the aggresomes. (G'-G'') In control cells,  $\gamma$ -tubulin  
519 (red) was observed as two punctae with  $\alpha$ -syn diffuse within the cytoplasm. (H-H'')  $\gamma$ -tubulin  
520 staining (red) also co-localises with endogenous  $\alpha$ -syn in the aggresome when treated with  
521 MG-132. Differentiated SH-SY5Y cells were mock-treated (I-I'') and vimentin (red) staining  
522 was observed surrounding the nuclei as well as along the axon. J-J'') Cells treated with MG-  
523 132 ( $1\mu\text{M}$  for 18 hours) vimentin staining changed to a compact structure near the nuclei,  
524 indicative of aggresomes. K-K'') In mock-treated cells  $\gamma$ -tubulin formed two punctae next to  
525 the nucleus. L-L'') In treated cells, aggresomes were detected by  $\gamma$ -tubulin staining.

526 Differentiated SH-SY5Y cells are TH positive. M-M'') In rat basal ganglion neurons,  
527 vimentin staining (red) is abundant around the nuclei and along the axon. N-N'') When  
528 treated with MG-132, vimentin localises to the aggresome. (O-O'') In rat basal ganglion  
529 neurons, the  $\gamma$ -tubulin is observed at two punctae close to the nucleus. P-P'') Upon MG-132  
530 treatment, the  $\gamma$ -tubulin staining now forms a larger structure next to the nucleus.

531

532 **Supplementary Figure S2. Microtubule nucleation is disrupted in the presence of**  
533 **aggresomes in undifferentiated SH-SY5Y cells.** A) Top row, SH-SY5Y cells have an  
534 extensive microtubule network. Upon cold treatment microtubules depolymerise. Upon  
535 warming microtubules nucleate from the centrosome forming a characteristic aster, which  
536 continues to grow until the network is re-established. In SH-SY5Y cells transfected with  
537 GFP, the aster is seen within 30 seconds and the microtubule network is re-established within  
538 in 10. A) Second and third rows: aggresomes formed by the over expression of GFP- $\alpha$ -  
539 synuclein ( $\alpha$ -SYN WT or  $\alpha$ SYNA30P) inhibited microtubule nucleation: the centrosome is  
540 unable to re-establish the network in 10 min. Nuclei stained with DAPI (blue). B) Panels for  
541 first and third rows of A shown with alpha tubulin staining only. Scale bar 100 $\mu$ m.

542

543 **Supplementary Movie S1. Time-lapse of RPE1-hTERT migrating to close the wound.**  
544 Bright field view showing RPE1-hTERT cells migrate to close the wound when a strip of  
545 cells is removed from a monolayer of confluent cells within in 12 hours.

546 **Supplementary Movie S2. Time-lapse of RPE1-hTERT showing cells fail to close the**  
547 **wound in the presence of aggresomes.** Bright field view of RPE1-hTERT cells failing to  
548 migrate and close the wound in the presence of aggresomes induced by MG-132 exposure.

549

550

## References

551

- 552 Alves G, Forsaa EB, Pedersen KF, Dreetz Gjerstad M, Larsen JP (2008) Epidemiology of  
553 Parkinson's disease. *J Neurol* **255 Suppl 5**: 18-32  
554
- 555 Baba M, Nakajo S, Tu PH, Tomita T, Nakaya K, Lee VM, Trojanowski JQ, Iwatsubo T  
556 (1998) Aggregation of alpha-synuclein in Lewy bodies of sporadic Parkinson's disease and  
557 dementia with Lewy bodies. *Am J Pathol* **152**: 879-884  
558
- 559 Bornens M (2002) Centrosome composition and microtubule anchoring mechanisms. *Curr*  
560 *Opin Cell Biol* **14**: 25-34  
561
- 562 Conway KA, Harper JD, Lansbury PT (1998) Accelerated in vitro fibril formation by a  
563 mutant alpha-synuclein linked to early-onset Parkinson disease. *Nat Med* **4**: 1318-1320  
564
- 565 De Brabander M, Geuens G, Nuydens R, Willebrords R, Aerts F, De Mey J (1986)  
566 Microtubule dynamics during the cell cycle: the effects of taxol and nocodazole on the  
567 microtubule system of Pt K2 cells at different stages of the mitotic cycle. *Int Rev Cytol* **101**:  
568 215-274  
569
- 570 Didier C, Merdes A, Gairin JE, Jabrane-Ferrat N (2008) Inhibition of proteasome activity  
571 impairs centrosome-dependent microtubule nucleation and organization. *Mol Biol Cell* **19**:  
572 1220-1229  
573
- 574 Doty RL, Deems DA, Stellar S (1988) Olfactory dysfunction in parkinsonism: a general  
575 deficit unrelated to neurologic signs, disease stage, or disease duration. *Neurology* **38**: 1237-  
576 1244



577

578 Exner N, Lutz AK, Haass C, Winklhofer KF (2012) Mitochondrial dysfunction in Parkinson's

579 disease: molecular mechanisms and pathophysiological consequences. *EMBO J* **31**: 3038-

580 3062

581

582 Fry AM, Meraldi P, Nigg EA (1998) A centrosomal function for the human Nek2 protein

583 kinase, a member of the NIMA family of cell cycle regulators. *EMBO J* **17**: 470-481

584

585 Haehner A, Hummel T, Hummel C, Sommer U, Junghanns S, Reichmann H (2007) Olfactory

586 loss may be a first sign of idiopathic Parkinson's disease. *Mov Disord* **22**: 839-842

587

588 Ibanez P, Bonnet AM, DeBarges B, Lohmann E, Tison F, Pollak P, Agid Y, Durr A, Brice A

589 (2004) Causal relation between alpha-synuclein gene duplication and familial Parkinson's

590 disease. *Lancet* **364**: 1169-1171

591

592 Ibanez-Tallon I, Heintz N, Omran H (2003) To beat or not to beat: roles of cilia in

593 development and disease. *Hum Mol Genet* **12**: R27-35

594

595 Johnston JA, Ward CL, Kopito RR (1998) Aggresomes: a cellular response to misfolded

596 proteins. *J Cell Biol* **143**: 1883-1898

597

598 Kruger R, Kuhn W, Muller T, Woitalla D, Graeber M, Kosel S, Przuntek H, Eppelen JT,

599 Schols L, Riess O (1998) Ala30Pro mutation in the gene encoding alpha-synuclein in

600 Parkinson's disease. *Nat Genet* **18**: 106-108

601

602 Marsh J, Bagol SH, Williams RSB, Dickson G, Alifragis P (2017) Synapsin I  
603 phosphorylation is dysregulated by beta-amyloid oligomers and restored by valproic acid.  
604 *Neurobiol Dis* **106**: 63-75  
605  
606 McNaught KS, Shashidharan P, Perl DP, Jenner P, Olanow CW (2002) Aggresome-related  
607 biogenesis of Lewy bodies. *Eur J Neurosci* **16**: 2136-2148  
608  
609 Nigg EA, Raff JW (2009) Centrioles, centrosomes, and cilia in health and disease. *Cell* **139**:  
610 663-678  
611  
612 Nobes CD, Hall A (1999) Rho GTPases control polarity, protrusion, and adhesion during cell  
613 movement. *J Cell Biol* **144**: 1235-1244  
614  
615 Olanow CW, Perl DP, DeMartino GN, McNaught KS (2004) Lewy-body formation is an  
616 aggresome-related process: a hypothesis. *Lancet Neurol* **3**: 496-503  
617  
618 Olzmann JA, Li L, Chin LS (2008) Aggresome formation and neurodegenerative diseases:  
619 therapeutic implications. *Curr Med Chem* **15**: 47-60  
620  
621 Pignatelli A, Belluzzi O (2017) Dopaminergic Neurones in the Main Olfactory Bulb: An  
622 Overview from an Electrophysiological Perspective. *Front Neuroanat* **11**: 7  
623  
624 Polymeropoulos MH, Lavedan C, Leroy E, Ide SE, Dehejia A, Dutra A, Pike B, Root H,  
625 Rubenstein J, Boyer R, Stenroos ES, Chandrasekharappa S, Athanassiadou A,  
626 Papapetropoulos T, Johnson WG, Lazzarini AM, Duvoisin RC, Di Iorio G, Golbe LI,

627 Nussbaum RL (1997) Mutation in the alpha-synuclein gene identified in families with  
628 Parkinson's disease. *Science* **276**: 2045-2047  
629  
630 Schrag A, Ben-Shlomo Y, Quinn NP (2000) Cross sectional prevalence survey of idiopathic  
631 Parkinson's disease and Parkinsonism in London. *BMJ* **321**: 21-22  
632  
633 Singleton AB, Farrer M, Johnson J, Singleton A, Hague S, Kachergus J, Hulihan M,  
634 Peuralinna T, Dutra A, Nussbaum R, Lincoln S, Crawley A, Hanson M, Maraganore D, Adler  
635 C, Cookson MR, Muentzer M, Baptista M, Miller D, Blancato J, Hardy J, Gwinn-Hardy K  
636 (2003) alpha-Synuclein locus triplication causes Parkinson's disease. *Science* **302**: 841  
637  
638 Spillantini MG, Schmidt ML, Lee VM, Trojanowski JQ, Jakes R, Goedert M (1997) Alpha-  
639 synuclein in Lewy bodies. *Nature* **388**: 839-840  
640  
641 Tanaka M, Kim YM, Lee G, Junn E, Iwatsubo T, Mouradian MM (2004) Aggresomes  
642 formed by alpha-synuclein and synphilin-1 are cytoprotective. *J Biol Chem* **279**: 4625-4631  
643  
644 Van Den Eeden SK, Tanner CM, Bernstein AL, Fross RD, Leimpeter A, Bloch DA, Nelson  
645 LM (2003) Incidence of Parkinson's disease: variation by age, gender, and race/ethnicity. *Am*  
646 *J Epidemiol* **157**: 1015-1022  
647  
648 von Campenhausen S, Bornschein B, Wick R, Botzel K, Sampaio C, Poewe W, Oertel W,  
649 Siebert U, Berger K, Dodel R (2005) Prevalence and incidence of Parkinson's disease in  
650 Europe. *Eur Neuropsychopharmacol* **15**: 473-490  
651

652 Wakabayashi K, Tanji K, Odagiri S, Miki Y, Mori F, Takahashi H (2012) The Lewy Body in  
653 Parkinson's Disease and Related Neurodegenerative Disorders. *Mol Neurobiol*  
654  
655 Winslow AR, Chen CW, Corrochano S, Acevedo-Arozena A, Gordon DE, Peden AA,  
656 Lichtenberg M, Menzies FM, Ravikumar B, Imarisio S, Brown S, O'Kane CJ, Rubinsztein  
657 DC (2010) alpha-Synuclein impairs macroautophagy: implications for Parkinson's disease. *J*  
658 *Cell Biol* **190**: 1023-1037  
659  
660

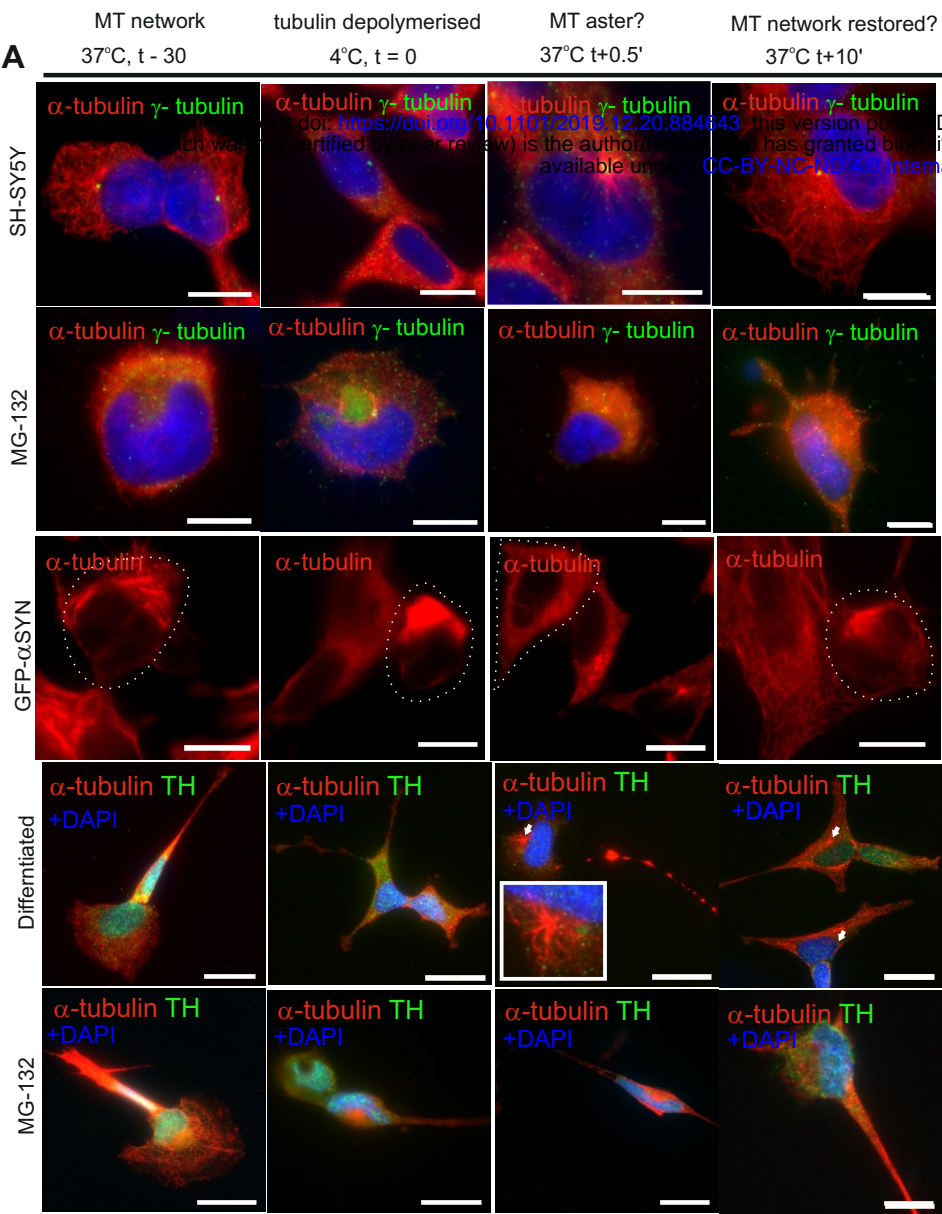

December 20, 2019. The copyright holder for this preprint (which was not certified by peer review) is the author/funder, who has granted bioRxiv a license to display the preprint in perpetuity. It is made available under aCC-BY-NC-ND 4.0 International license.

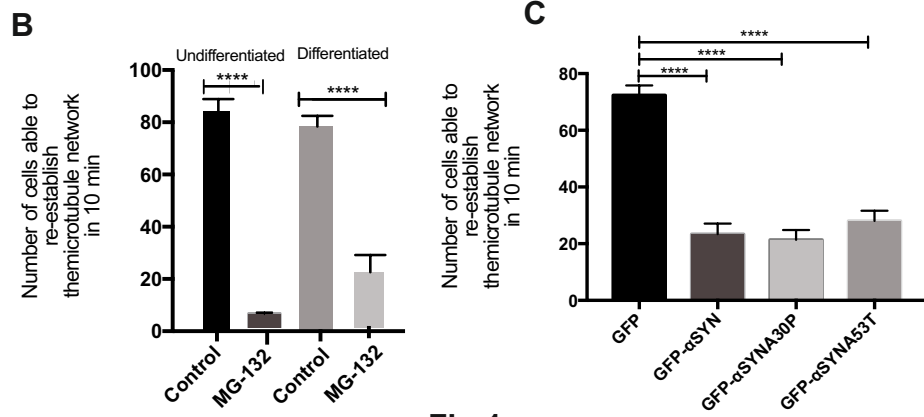

**Fig 1**

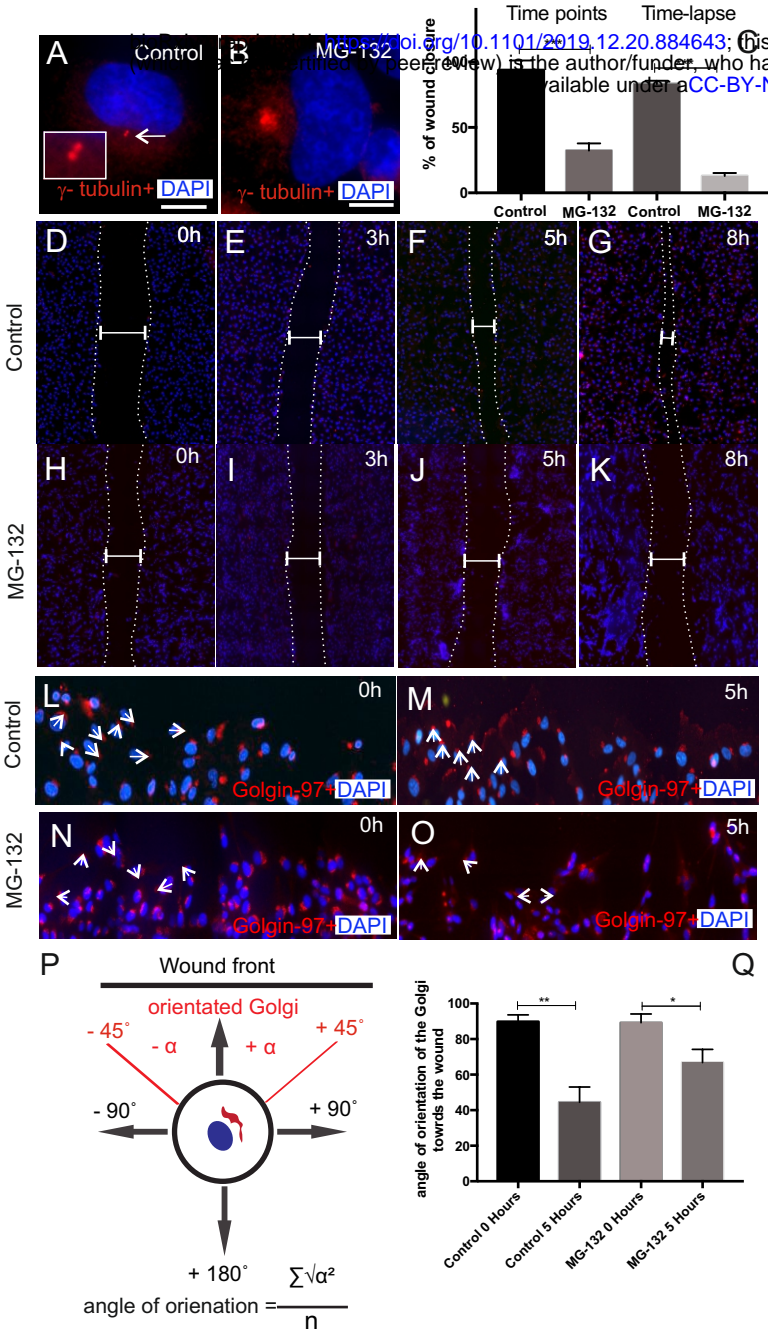

Fig 2

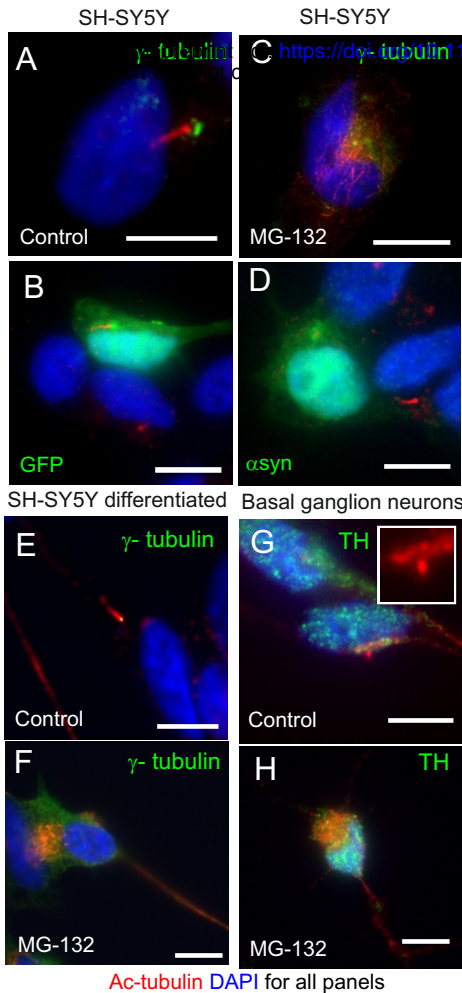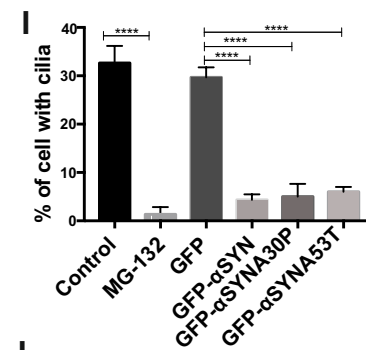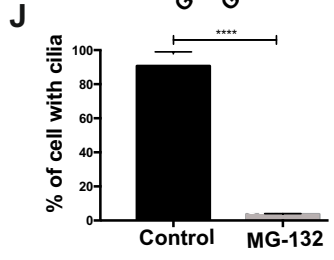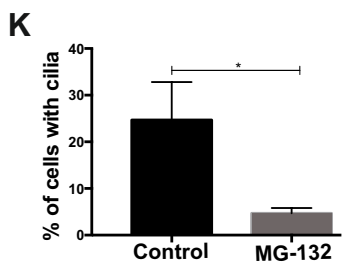

Fig 3



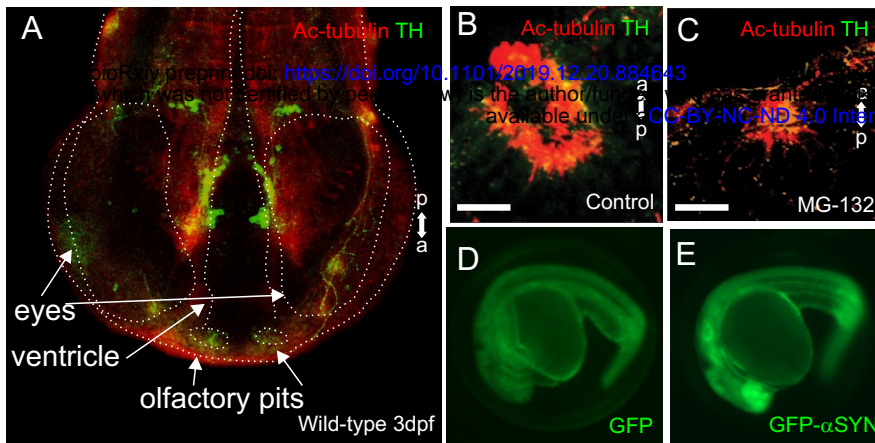

December 20, 2019. The copyright holder for this preprint is the author/funder, who has granted bioRxiv a license to display the preprint in perpetuity. It is made available under aCC-BY-NC-ND 4.0 International license.

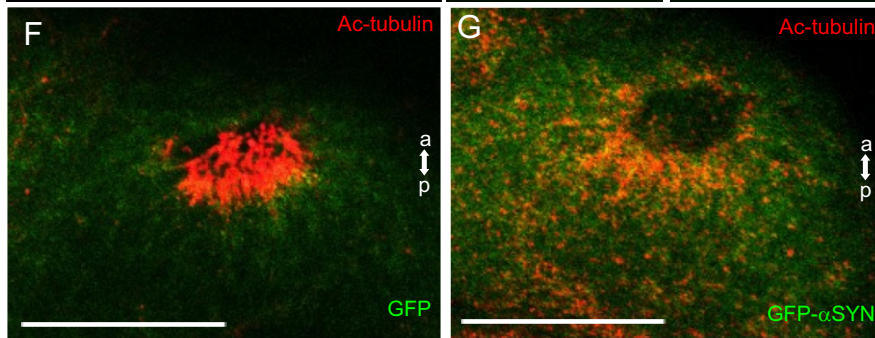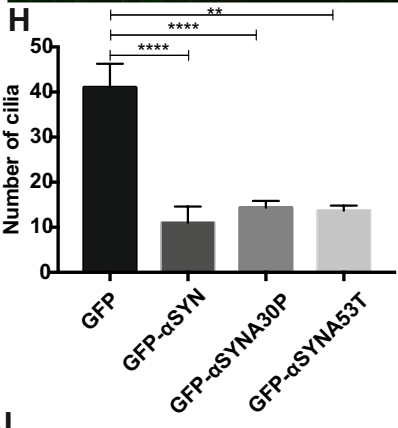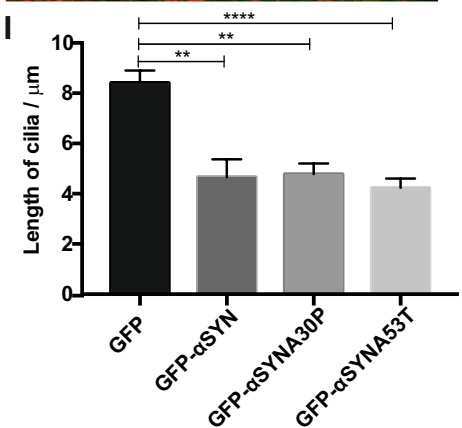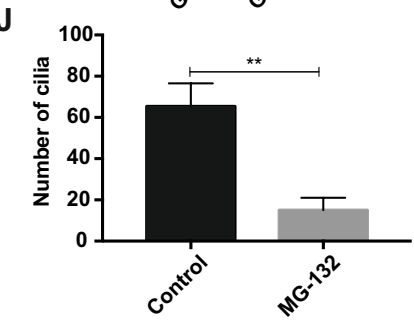

**Fig 4**



SH-SY5Y

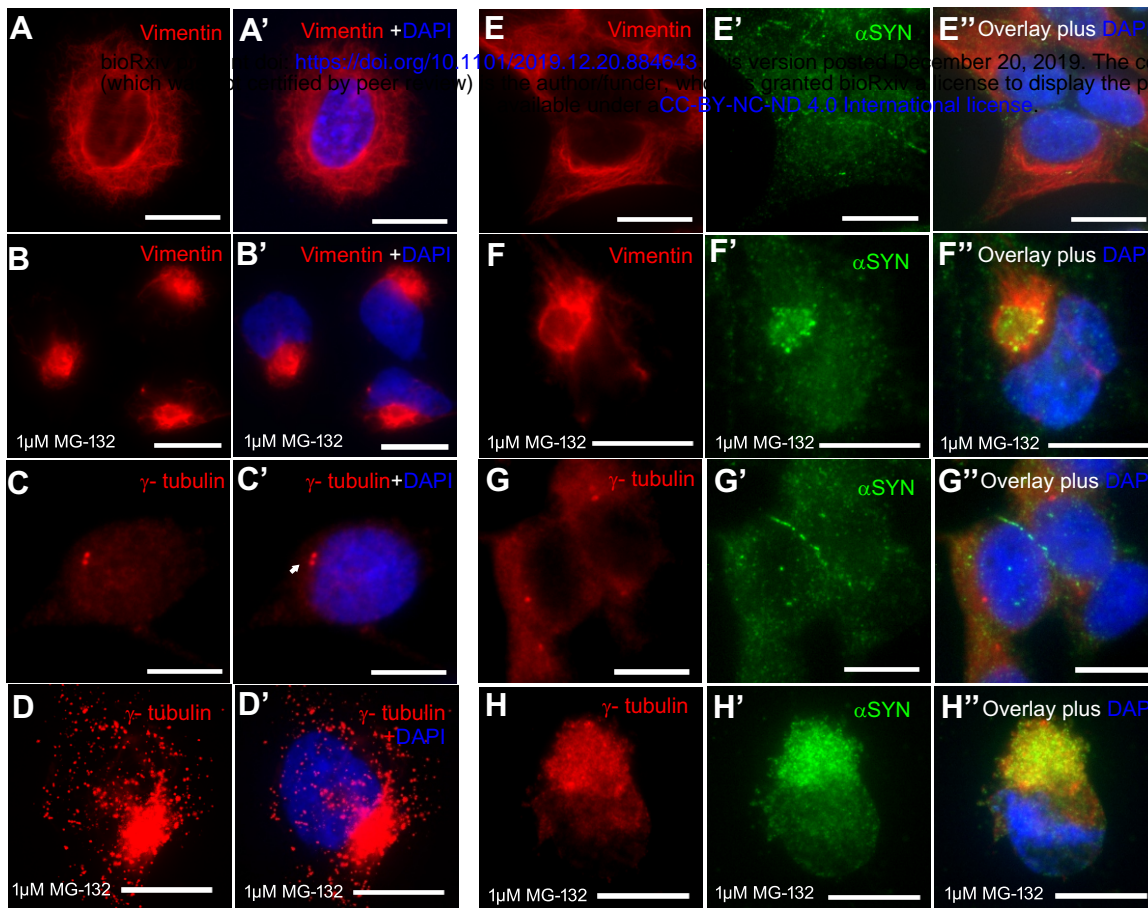

SH-SY5Y differentiated

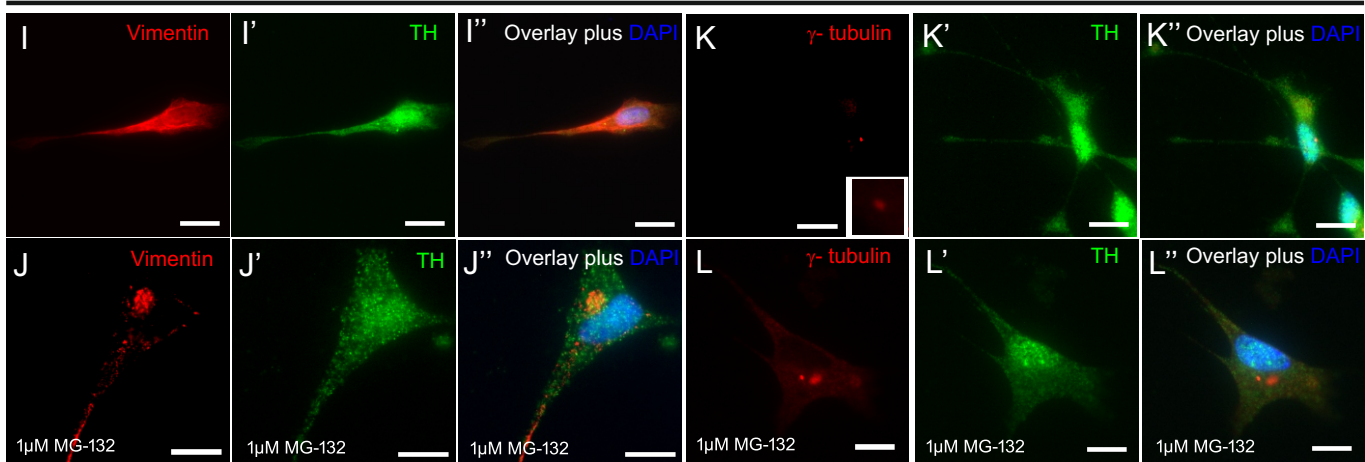

Basal ganglion neurons

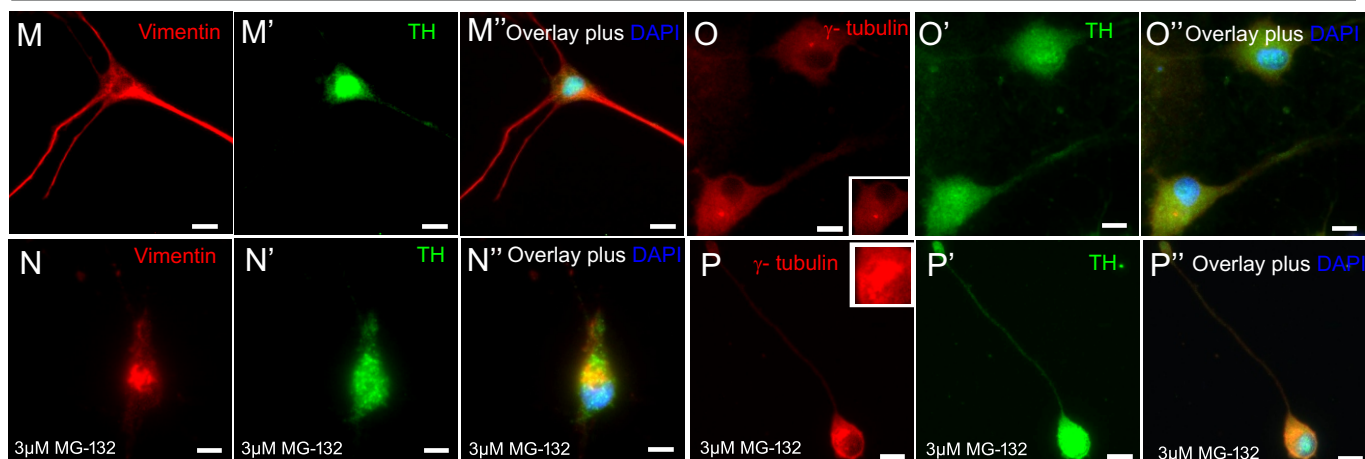

Fig S1

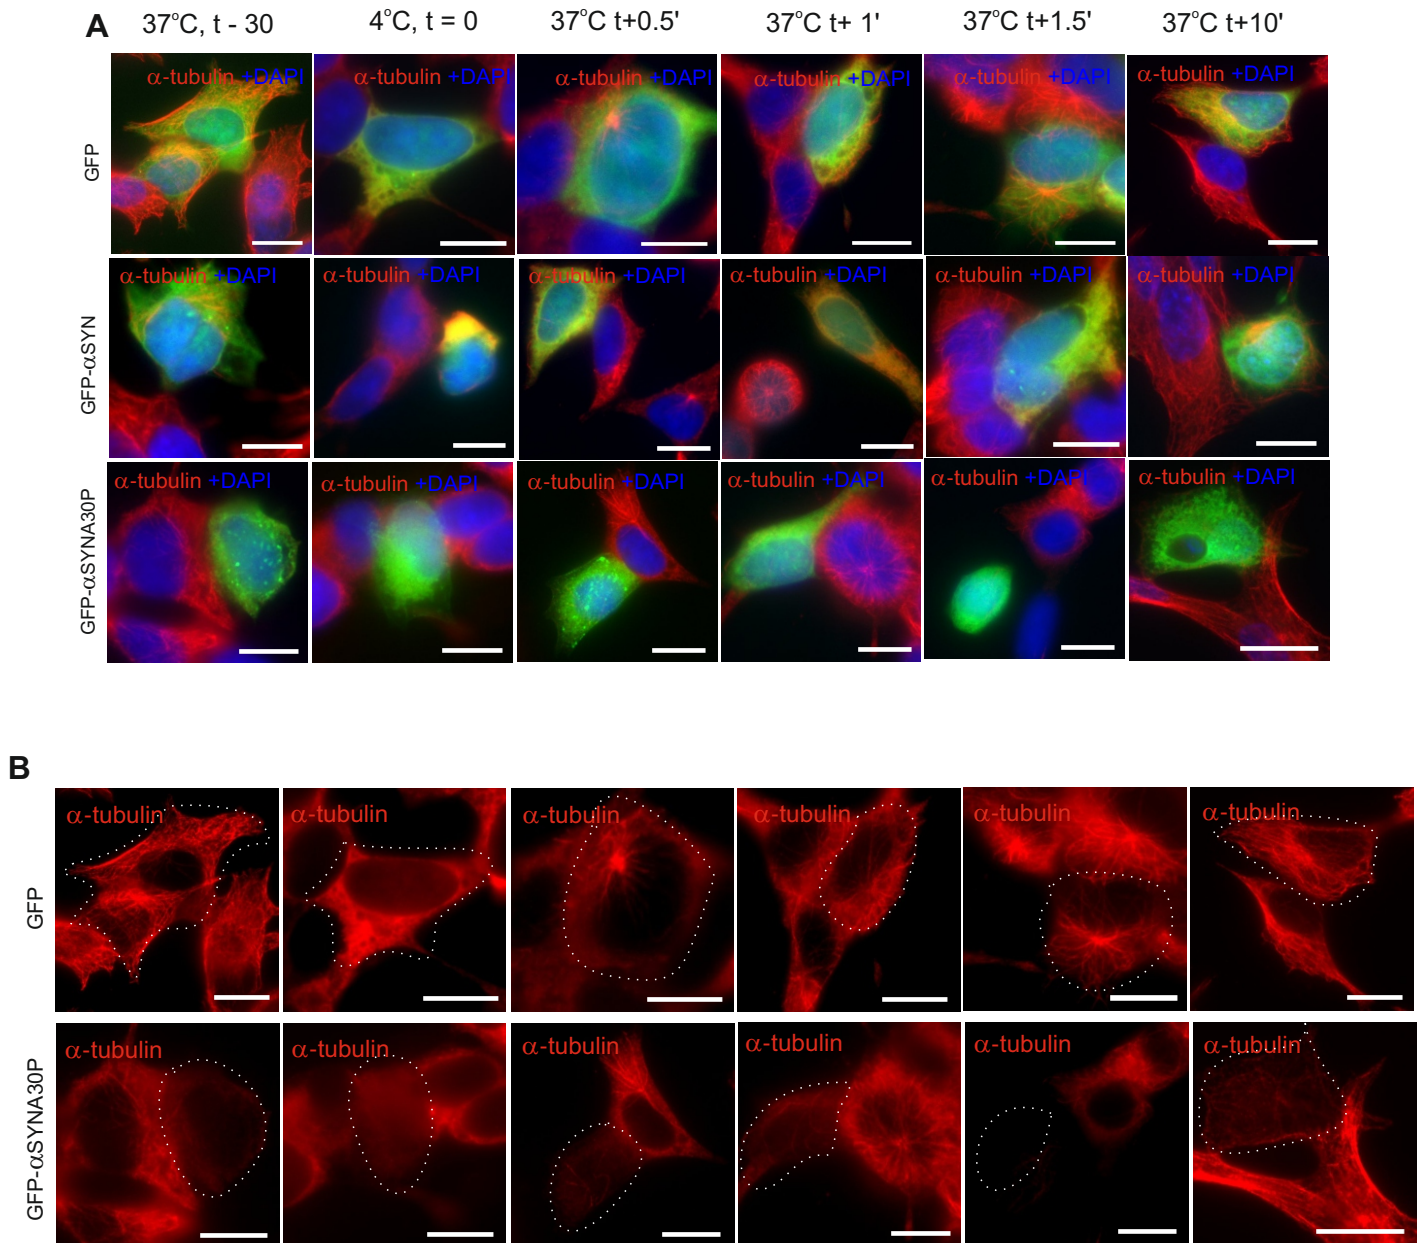

Fig S 2
